# Supplementary material
Source: bioRxiv or medRxiv preprint supplement (https://medrxiv.org/content/medrxiv/early/2021/05/15/2021.05.12.21257131/DC1/embed/media-1.pdf)
Supplement: Supplementary file [file media-1.pdf]

1 **SUPPLEMENT: Asymptomatic SARS-CoV-2 screening tests to facilitate full-time school attendance:**  
2 **model-based analysis of cost and impact**

3  
4 Alyssa Bilinski MS<sup>1</sup>; Andrea Ciaranello MD<sup>2</sup>; Meagan C. Fitzpatrick PhD<sup>3</sup>; John Giardina<sup>1</sup>; Maunank Shah  
5 MD, PhD<sup>4</sup>; Joshua Salomon PhD<sup>5</sup>; Emily A. Kendall MD, PhD<sup>4</sup>

6  
7 <sup>1</sup> Harvard Graduate School of Arts and Sciences, Cambridge, MA

8 <sup>2</sup> Medical Practice Evaluation Center and Division of Infectious Disease, Massachusetts General Hospital,  
9 Harvard Medical School, Boston, Massachusetts

10 <sup>3</sup> Center for Vaccine Development and Global Health, University of Maryland School of Medicine,  
11 Baltimore, Maryland

12 <sup>4</sup> Division of Infectious Diseases, Johns Hopkins University School of Medicine, Baltimore, MD

13 <sup>5</sup> Center for Health Policy and Center for Primary Care and Outcomes Research, Stanford University  
14 School of Medicine, Stanford, California

15  
16  
17  
18  
19  
20  
21  
22  
23  
24  
25  
26  
27  
28  
29  
30  
31  
32  
33  
34  
35  
36  
37  
38  
39  
40  
41  
42  
43  
44  
45  
46  
47

48 **Model Details**

49

50 We assumed an SEIR model of COVID-18 transmission (1). Briefly, when individuals interacted with an  
51 agent (i.e. person) infected with SARS-CoV-2, transmission risk was proportional to duration and  
52 intensity of exposure. The model drew stochastic outcomes assuming an average incubation period of  
53 three days prior to the onset of infectiousness, two days of pre-symptomatic transmission if symptoms  
54 develop (2,3), total infectious time of five days (4–7), and overdispersion of infectivity in adolescents  
55 and adults (4,8) (Table 1). We assumed that adults with fully asymptomatic disease transmit COVID-19  
56 at half the rate of those with any symptoms (9). We assumed vaccine coverage among teachers  
57 sufficient to reduce susceptibility to infection by 80%, with approximately 90% coverage and 90%  
58 reduction in infection risk among vaccinated individuals. Students were not vaccinated in the primary  
59 model, but 50% reduction in the susceptibility of middle school students is included as a sensitivity  
60 analysis. Based on data from household contact tracing studies, we further specified that, in absence of  
61 vaccination, children under 10 are half as susceptible and half as infectious as symptomatic adolescents  
62 and adults (10–14). Beyond interactions with infectious agents within the simulation, students, staff,  
63 and their families had a probability of becoming infected through other community interactions  
64 equivalent to an age-adjusted community per capita daily incidence, with children and adolescents  
65 having half the incidence of unvaccinated adults.

66

67 In all scenarios, symptom-driven COVID diagnostic testing still occurred outside of the school  
68 environment: individuals with COVID-19 who developed clinically-recognizable symptoms were assumed  
69 to self-isolate from out-of-household contacts (including staying home from school) and to obtain  
70 testing in the community. Results became available 24 hours after the first appearance of symptoms, at  
71 which point classrooms were notified and quarantined for 10 days. Symptom-driven community-based  
72 testing, and self-isolation of symptomatic individuals who had not been tested since symptom onset,  
73 were assumed to occur with the same probabilities regardless of in-school screening practices.

74

75

76 **Fig S1 Model diagram**

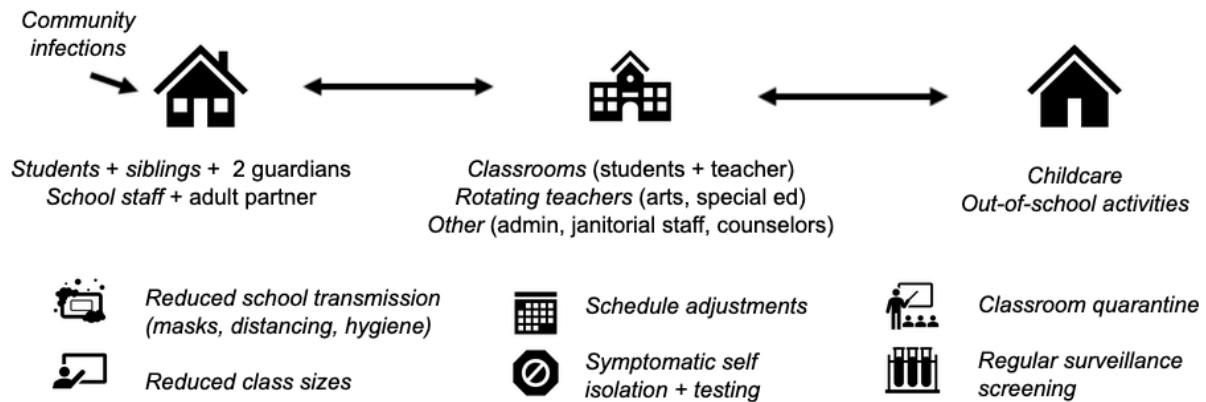

77

78

79

80

81

82

83

84 **Fig S2. Incidence, case detection, and school attendance outcomes if screening strategies are**  
 85 **accompanied by a reduction of the classroom quarantine duration to 7 days.**  
 Elementary, with 7-day quarantine if screening

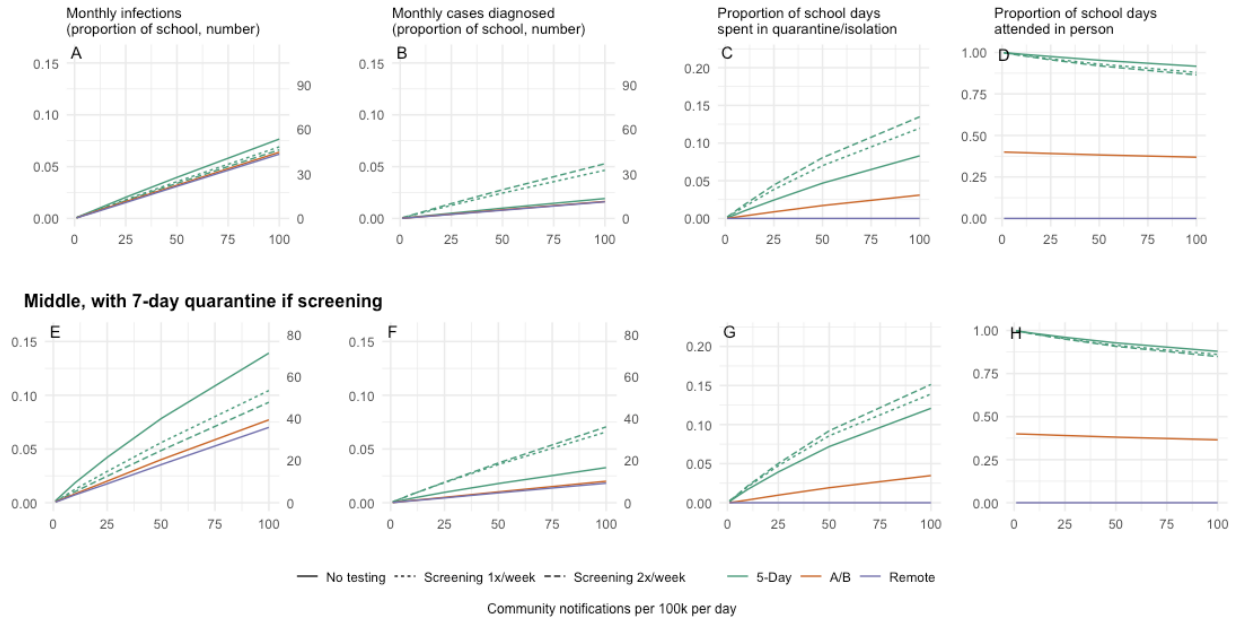

86  
 87  
 88  
 89  
 90  
 91  
 92  
 93  
 94  
 95  
 96  
 97  
 98  
 99  
 100  
 101  
 102  
 103  
 104  
 105  
 106  
 107  
 108  
 109  
 110  
 111  
 112

113 **Fig S3. Screening costs, as dollars per student per month in an elementary school.** Costs decline at  
114 higher levels of incidence because increases in classroom quarantine cause screening days to be missed;  
115 potential costs of community-based testing by exposed students or their contacts are not modeled.

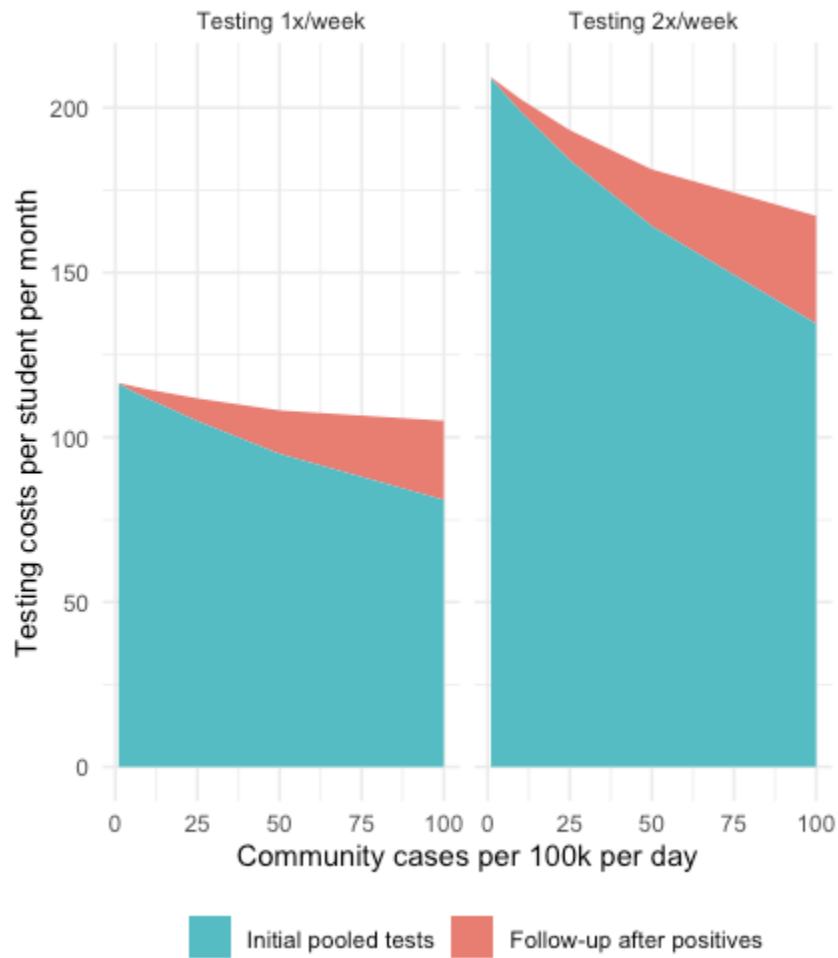

116  
117  
118  
119  
120  
121  
122  
123  
124  
125  
126  
127  
128  
129  
130  
131  
132

133 **Fig S4. Screening costs, as dollars per student per month in a middle school.** As incidence rises, the  
 134 spending on initial tests declines because increases in classroom quarantine cause screening days to be  
 135 missed, but the higher proportion of pooled results that are positive and require individual follow-up  
 136 testing results in little change in overall cost per student.

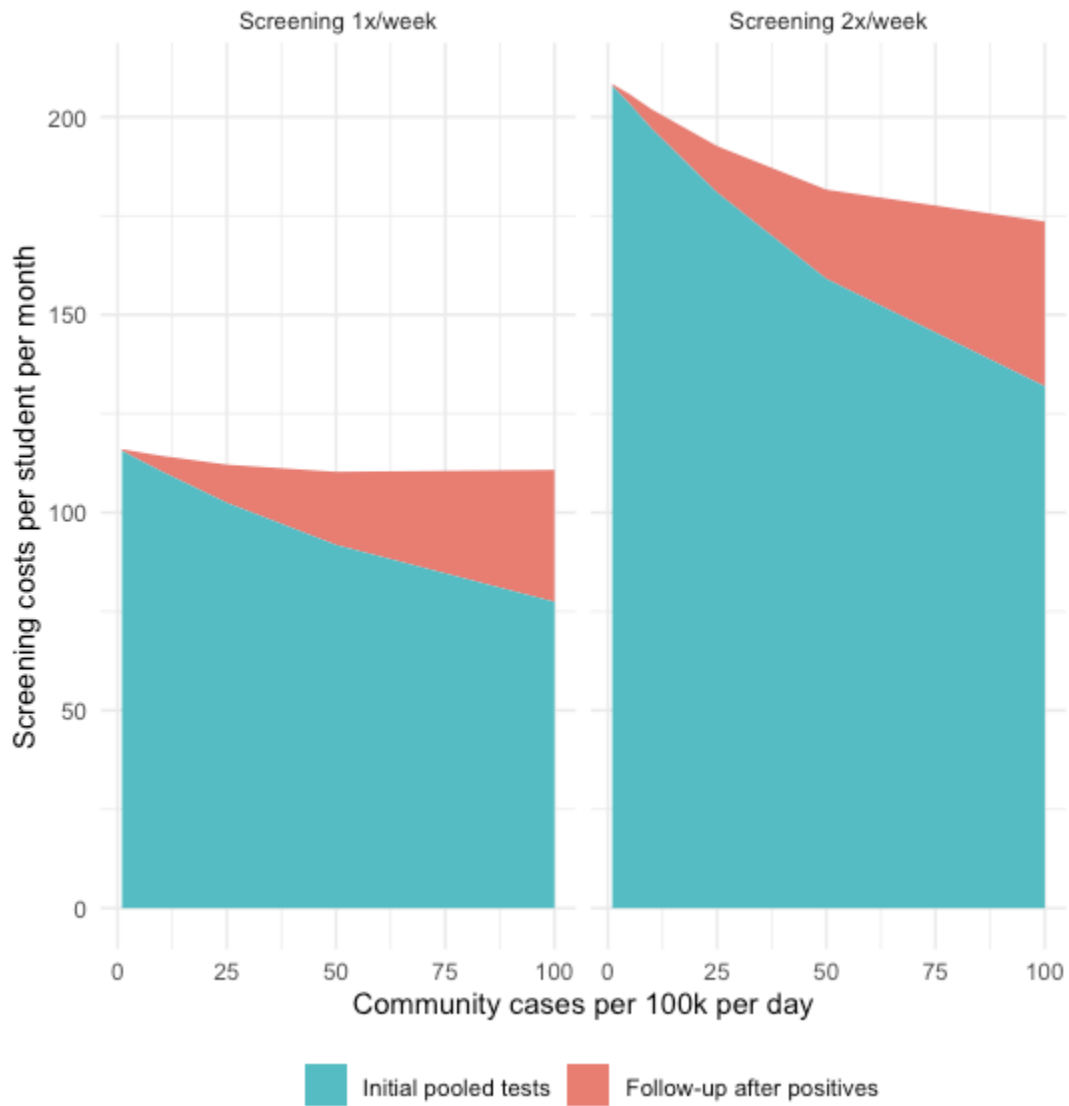

137  
 138  
 139  
 140  
 141  
 142  
 143  
 144  
 145  
 146  
 147  
 148  
 149

150 Fig S5. Childcare costs (elementary school)

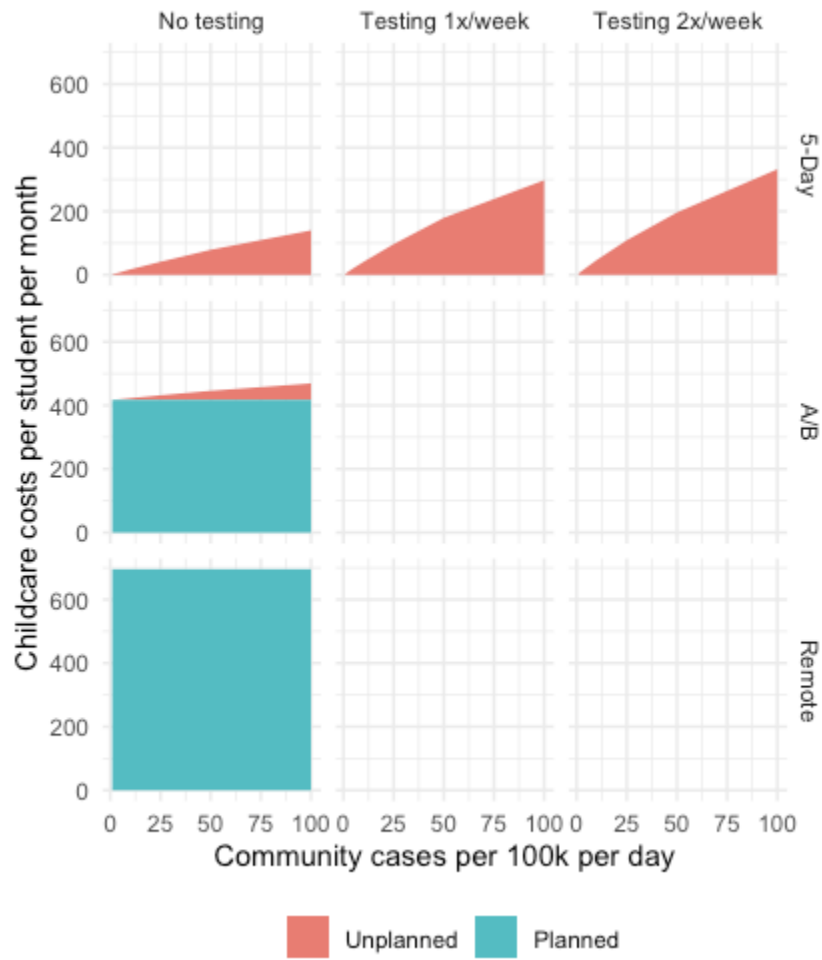

151  
 152  
 153  
 154  
 155  
 156  
 157  
 158  
 159  
 160  
 161  
 162  
 163  
 164  
 165  
 166  
 167  
 168  
 169  
 170

171 **Fig S6. Childcare costs (middle school)**

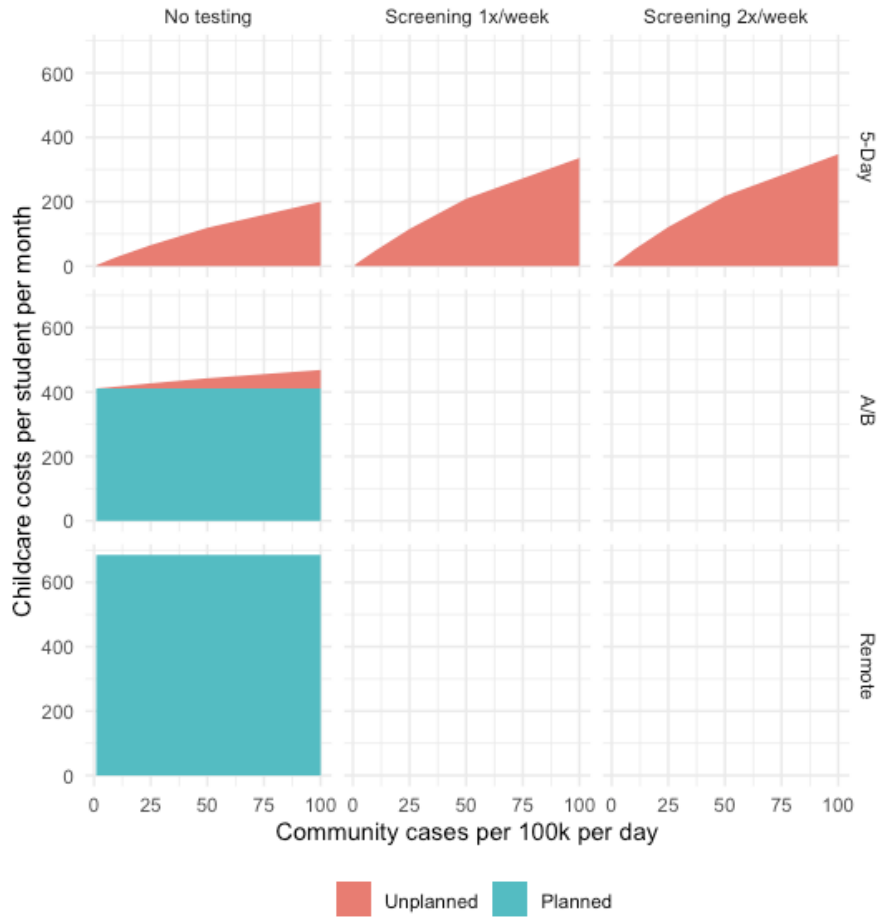

172  
173  
174  
175  
176  
177  
178  
179  
180  
181  
182  
183  
184  
185  
186  
187  
188  
189  
190  
191  
192

193 **Fig S7. Costs associated with rapid antigen screening tests** (weekly tests at \$12 per test, PCR  
 194 confirmation of positive results with same one-day turnaround, 0.5% false positive rapid tests, no  
 195 change in sensitivity for acute infection) compared to those of schedule-based mitigation and of full-  
 196 time in-person attendance without asymptomatic screening.  
 197

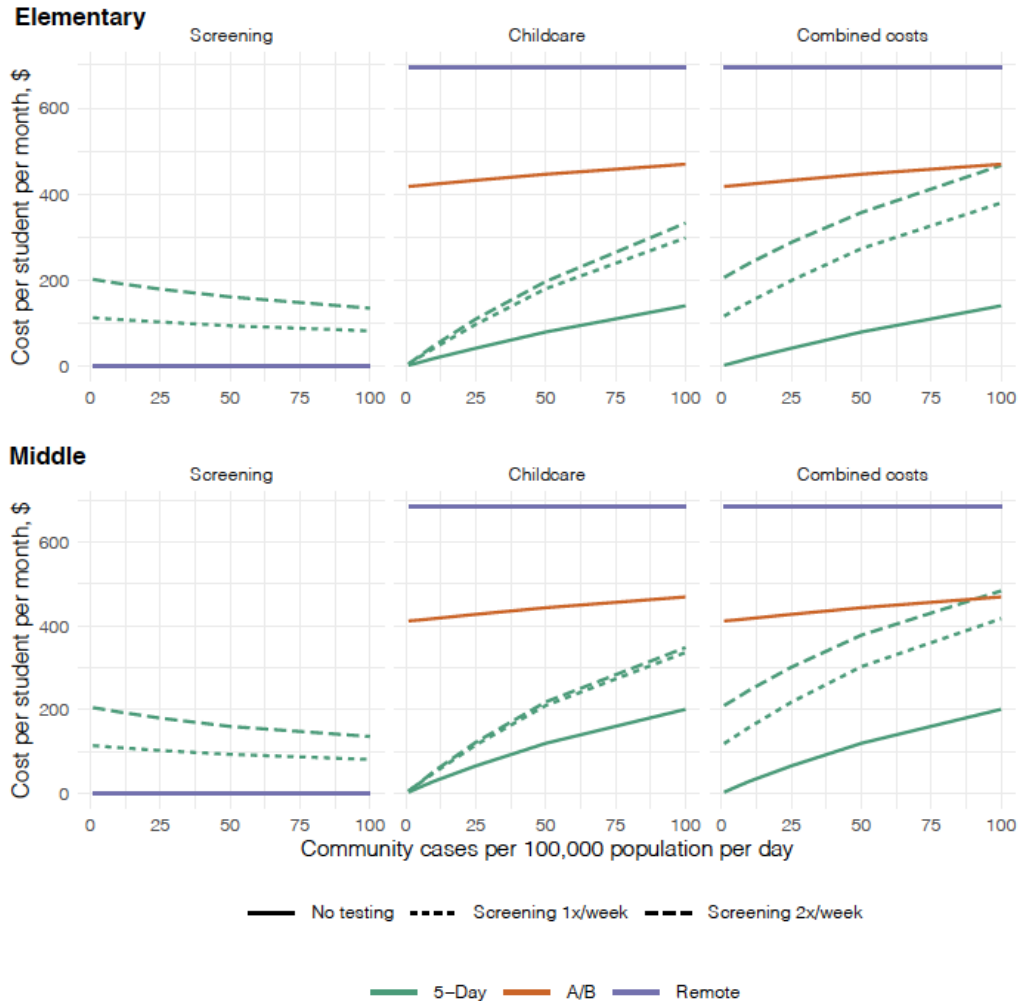

198  
 199  
 200  
 201  
 202  
 203  
 204  
 205  
 206  
 207  
 208  
 209  
 210  
 211  
 212



213 Fig S8. Cost-effectiveness of rapid screening (cost per infection directly averted among students and  
 214 staff), comparing weekly screening to full-time attendance without screening, under the same rapid  
 215 screening assumptions as in Figure S7.

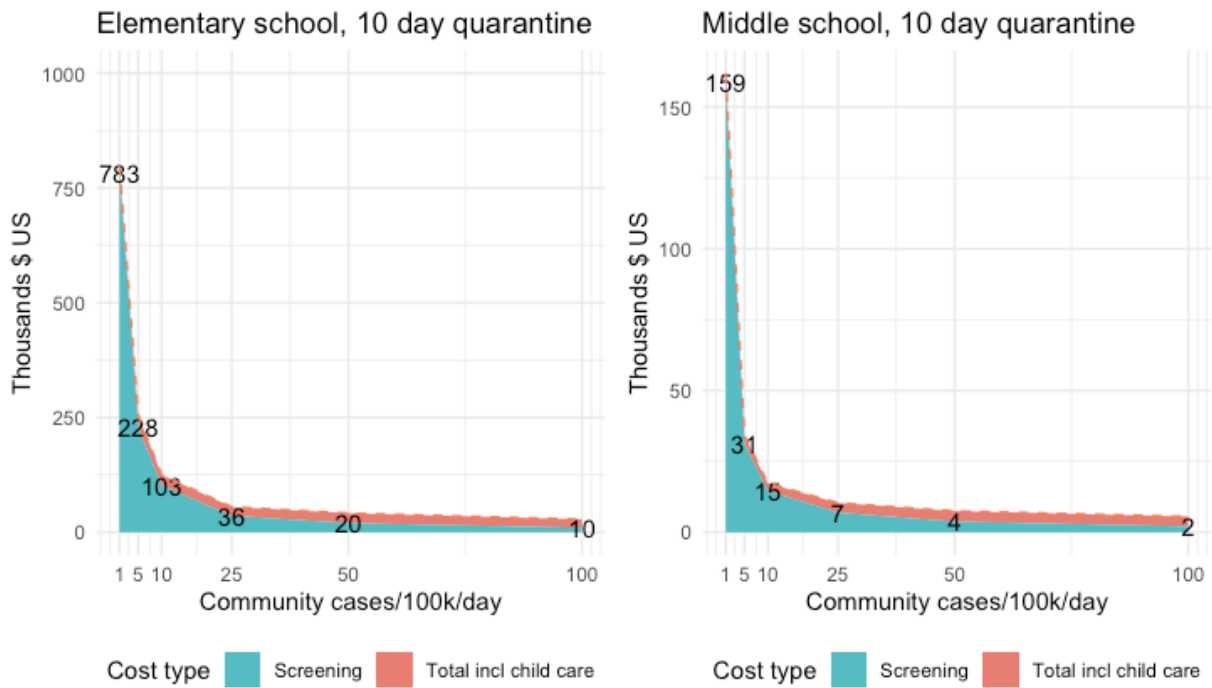

216  
 217  
 218  
 219  
 220  
 221  
 222  
 223  
 224  
 225  
 226  
 227  
 228  
 229  
 230  
 231  
 232  
 233  
 234  
 235  
 236  
 237  
 238  
 239

240 Fig S9. Cost effectiveness of weekly screening in middle school with 50% vaccination coverage of  
241 students (and 90% of teachers and staff).

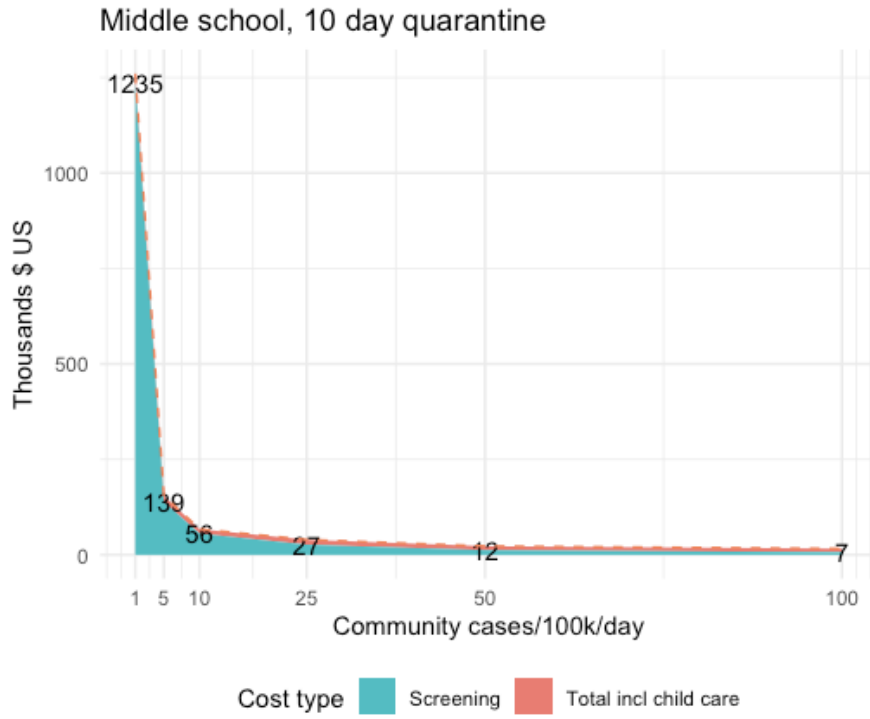

242  
243

244 **Fig S10. One-way sensitivity analyses.** Panels A and B consider how individual parameter values or  
 245 assumptions affect the difference in absolute incidence (infections per school per month)  
 246 between asymptomatic screening and hybrid scheduling approaches in an elementary (A) and middle school (B).  
 247 Panels C and D consider parameter sensitivity of the estimated cost per infection averted in an  
 248 elementary (C) and middle (D) school. In each panel, the vertical dashed line shows the value of the  
 249 outcome in the primary analysis. Text in gray along the dashed line indicates the values used in primary  
 250 analyses, and black text on bars shows the one or two additional values that were explored for each  
 251 parameter. Figures assume 90% teacher vaccination. For parameters other than the community  
 252 notification rate, sensitivity analyses use a notification rate of 25 cases/100k/day.

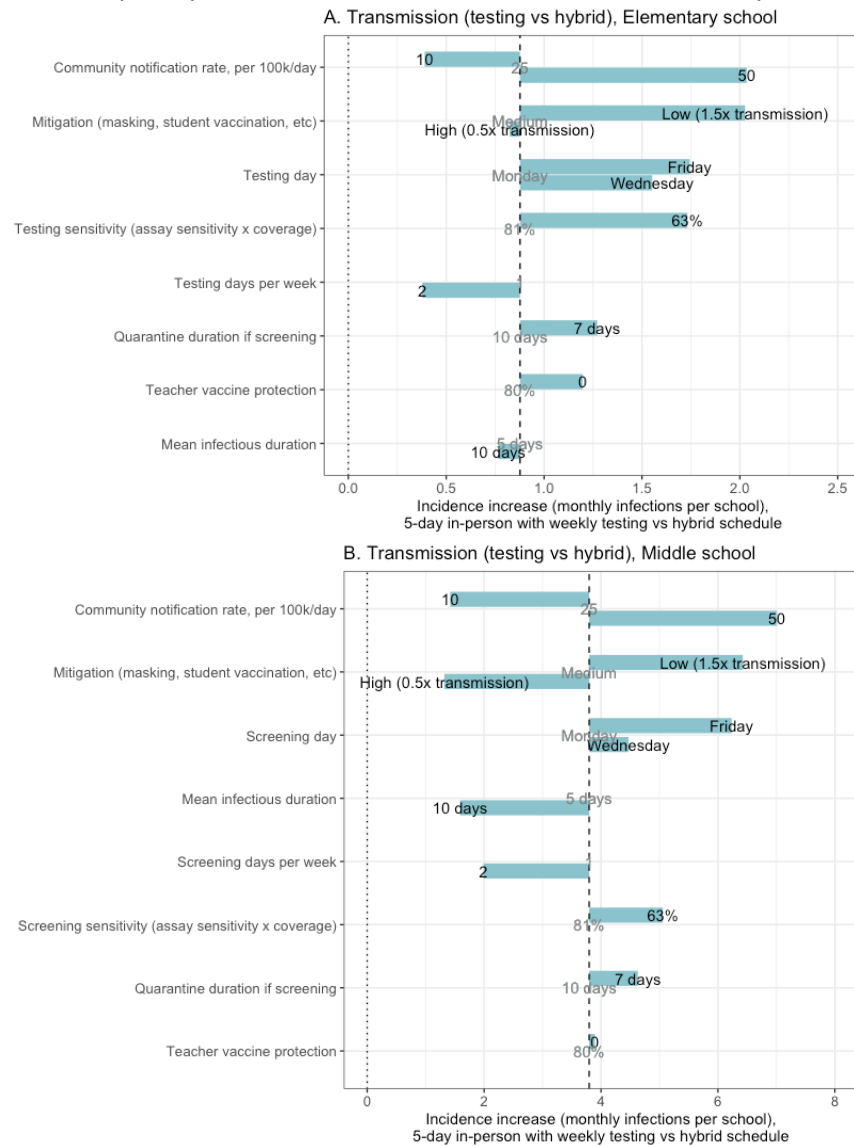

253

254

C. Cost, Elementary school

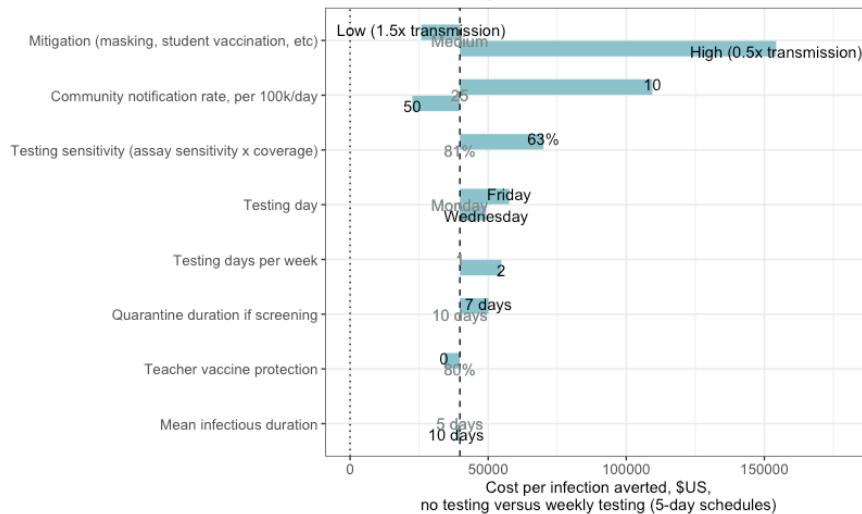

255

D. Cost, Middle school

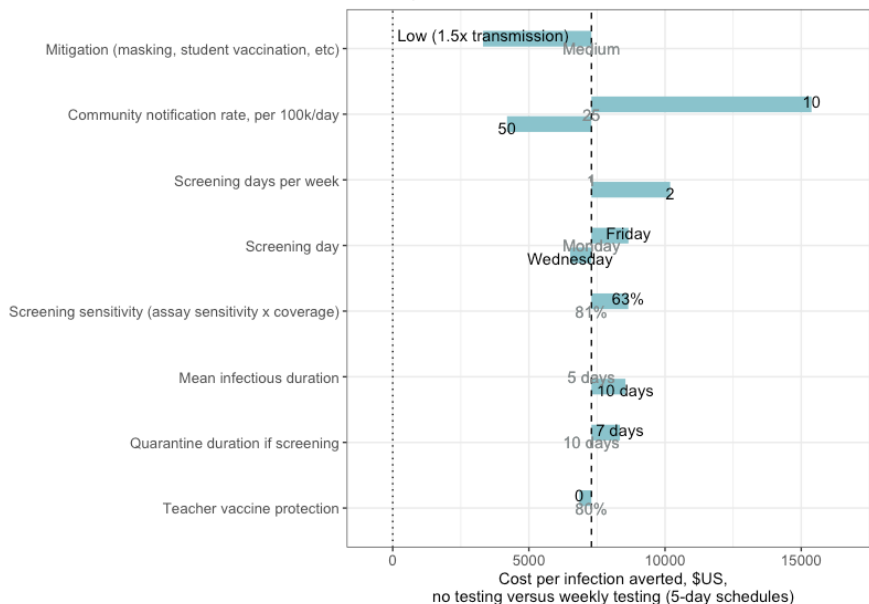

- 256
- 257
- 258
- 259
- 260
- 261
- 262
- 263
- 264
- 265
- 266
- 267
- 268
- 269
- 270

271 **Table S1. Comparison of transmission, case-detection, operational, and cost outcomes between**  
 272 **different schedules and screening frequencies**

273  
 274

|                                                                   | Infected (proportion of school per month) | Difference in proportion of school infected, per month vs full-time without screening | Proportion of incremental infections prevented (of difference between 5-day no screening and Remote) | Proportion of cases detected | In-person attendance (proportion of school days) | screening costs (\$ per student per month) | Societal costs (\$ per student per month) |
|-------------------------------------------------------------------|-------------------------------------------|---------------------------------------------------------------------------------------|------------------------------------------------------------------------------------------------------|------------------------------|--------------------------------------------------|--------------------------------------------|-------------------------------------------|
| <b>Elementary school, community notification rate 10/100k/day</b> |                                           |                                                                                       |                                                                                                      |                              |                                                  |                                            |                                           |
| 5-day no screening                                                | 0.008                                     | 0                                                                                     | 0                                                                                                    | 0.25                         | 0.99                                             | 0                                          | 17                                        |
| 5-day 1x screening                                                | 0.007                                     | -0.001                                                                                | 0.47                                                                                                 | 0.67                         | 0.98                                             | 115                                        | 155                                       |
| 5-day 2x screening                                                | 0.007                                     | -0.001                                                                                | 0.6                                                                                                  | 0.81                         | 0.97                                             | 203                                        | 249                                       |
| Hybrid                                                            | 0.007                                     | -0.002                                                                                | 0.73                                                                                                 | 0.25                         | 0.4                                              | 0                                          | 423                                       |
| Remote                                                            | 0.006                                     | -0.002                                                                                | 1                                                                                                    | 0.26                         | 0                                                | 0                                          | 695                                       |
| <b>Elementary school, community notification rate 50/100k/day</b> |                                           |                                                                                       |                                                                                                      |                              |                                                  |                                            |                                           |
| 5-day no screening                                                | 0.04                                      | 0                                                                                     | 0                                                                                                    | 0.25                         | 0.95                                             | 0                                          | 79                                        |
| 5-day 1x screening                                                | 0.035                                     | -0.005                                                                                | 0.54                                                                                                 | 0.65                         | 0.89                                             | 108                                        | 288                                       |
| 5-day 2x screening                                                | 0.033                                     | -0.007                                                                                | 0.76                                                                                                 | 0.77                         | 0.88                                             | 181                                        | 378                                       |
| Hybrid                                                            | 0.032                                     | -0.008                                                                                | 0.88                                                                                                 | 0.26                         | 0.38                                             | 0                                          | 446                                       |
| Remote                                                            | 0.031                                     | -0.009                                                                                | 1                                                                                                    | 0.26                         | 0                                                | 0                                          | 695                                       |
| <b>Middle school, community notification rate 10/100k/day</b>     |                                           |                                                                                       |                                                                                                      |                              |                                                  |                                            |                                           |
| 5-day no screening                                                | 0.018                                     | 0                                                                                     | 0                                                                                                    | 0.23                         | 0.98                                             | 0                                          | 28                                        |
| 5-day 1x screening                                                | 0.011                                     | -0.007                                                                                | 0.67                                                                                                 | 0.6                          | 0.97                                             | 114                                        | 163                                       |
| 5-day 2x screening                                                | 0.01                                      | -0.009                                                                                | 0.77                                                                                                 | 0.72                         | 0.97                                             | 202                                        | 254                                       |
| Hybrid                                                            | 0.008                                     | -0.01                                                                                 | 0.92                                                                                                 | 0.25                         | 0.4                                              | 0                                          | 417                                       |
| Remote                                                            | 0.007                                     | -0.011                                                                                | 1                                                                                                    | 0.25                         | 0                                                | 0                                          | 685                                       |
| <b>Middle school, community notification rate 50/100k/day</b>     |                                           |                                                                                       |                                                                                                      |                              |                                                  |                                            |                                           |

|                    |       |        |      |      |      |     |     |
|--------------------|-------|--------|------|------|------|-----|-----|
| 5-day no screening | 0.078 | 0      | 0    | 0.23 | 0.93 | 0   | 119 |
| 5-day 1x screening | 0.054 | -0.024 | 0.57 | 0.58 | 0.87 | 110 | 320 |
| 5-day 2x screening | 0.047 | -0.032 | 0.74 | 0.71 | 0.87 | 182 | 399 |
| Hybrid             | 0.04  | -0.038 | 0.89 | 0.25 | 0.38 | 0   | 443 |
| Remote             | 0.035 | -0.043 | 1    | 0.26 | 0    | 0   | 685 |

275  
276  
277  
278  
279  
280  
281  
282  
283  
284  
285  
286  
287  
288  
289  
290  
291  
292  
293  
294  
295  
296  
297  
298  
299  
300  
301  
302  
303  
304  
305  
306  
307  
308  
309  
310  
311  
312

313 **References**

- 314 1. Bilinski A, Salomon JA, Giardina J, Ciaranello A, Fitzpatrick MC. Passing the Test: A  
315 Model-based analysis of safe school-reopening strategies. Forthcoming in *Annals of Internal*  
316 *Medicine*.
- 317 2. Gatto M, Bertuzzo E, Mari L, Miccoli S, Carraro L, Casagrandi R, et al. Spread and  
318 dynamics of the COVID-19 epidemic in Italy: Effects of emergency containment measures. *Proc*  
319 *Natl Acad Sci USA*. 2020 May 12;117(19):10484–91.
- 320 3. He X, Lau EHY, Wu P, Deng X, Wang J, Hao X, et al. Temporal dynamics in viral shedding  
321 and transmissibility of COVID-19. *Nat Med*. 2020 Apr 15;1–4.
- 322 4. Kerr CC, Stuart RM, Mistry D, Abeysuriya RG, Hart G, Rosenfeld K, et al. Covasim: an  
323 agent-based model of COVID-19 dynamics and interventions. *medRxiv*. 2020 May  
324 15;2020.05.10.20097469.
- 325 5. He D, Zhao S, Lin Q, Zhuang Z, Cao P, Wang MH, et al. The relative transmissibility of  
326 asymptomatic COVID-19 infections among close contacts. *International Journal of Infectious*  
327 *Diseases*. 2020 May 1;94:145–7.
- 328 6. Li Q, Guan X, Wu P, Wang X, Zhou L, Tong Y, et al. Early Transmission Dynamics in  
329 Wuhan, China, of Novel Coronavirus–Infected Pneumonia. *New England Journal of Medicine*. 2020  
330 Jan 29;0(0):null.
- 331 7. Firth JA, Hellewell J, Klepac P, Kissler SM, CMMID COVID-19 working group, Kucharski AJ,  
332 et al. Combining fine-scale social contact data with epidemic modelling reveals interactions  
333 between contact tracing, quarantine, testing and physical distancing for controlling COVID-19  
334 [Internet]. *Epidemiology*; 2020 May [cited 2020 Jun 2]. Available from:  
335 <http://medrxiv.org/lookup/doi/10.1101/2020.05.26.20113720>
- 336 8. Endo A, Centre for the Mathematical Modelling of Infectious Diseases COVID-19  
337 Working Group, Abbott S, Kucharski AJ, Funk S. Estimating the overdispersion in COVID-19  
338 transmission using outbreak sizes outside China. *Wellcome Open Res*. 2020 Apr 9;5:67.
- 339 9. Byambasuren O, Cardona M, Bell K, Clark J, McLaws M-L, Glasziou P. Estimating the  
340 extent of asymptomatic COVID-19 and its potential for community transmission: Systematic review  
341 and meta-analysis. *Official Journal of the Association of Medical Microbiology and Infectious*  
342 *Disease Canada*. 2020 Dec 1;5(4):223–34.
- 343 10. Fontanet A, Grant R, Tondeur L, Madec Y, Grzelak L, Cailleau I, et al. SARS-CoV-2  
344 infection in primary schools in northern France: A retrospective cohort study in an area of high  
345 transmission. *medRxiv*. 2020 Jun 29;2020.06.25.20140178.
- 346 11. Stein-Zamir C, Abramson N, Shoob H, Libal E, Bitan M, Cardash T, et al. A large COVID-19  
347 outbreak in a high school 10 days after schools’ reopening, Israel, May 2020. *Eurosurveillance*.  
348 2020 Jul 23;25(29):2001352.
- 349 12. Dattner I, Goldberg Y, Katriel G, Yaari R, Gal N, Miron Y, et al. The role of children in the  
350 spread of COVID-19: Using household data from Bnei Brak, Israel, to estimate the relative  
351 susceptibility and infectivity of children [Internet]. *Infectious Diseases (except HIV/AIDS)*; 2020 Jun  
352 [cited 2020 Jun 19]. Available from: <http://medrxiv.org/lookup/doi/10.1101/2020.06.03.20121145>
- 353 13. Park YJ, Choe YJ, Park O, Park SY, Kim Y-M, Kim J, et al. Early Release - Contact Tracing  
354 during Coronavirus Disease Outbreak, South Korea, 2020 - Volume 26, Number 10—October 2020  
355 - *Emerging Infectious Diseases journal - CDC*. [cited 2020 Aug 1]; Available from:  
356 [https://wwwnc.cdc.gov/eid/article/26/10/20-1315\\_article](https://wwwnc.cdc.gov/eid/article/26/10/20-1315_article)
- 357 14. Fontanet A, Tondeur L, Madec Y, Grant R, Besombes C, Jolly N, et al. Cluster of COVID-19  
358 in northern France: A retrospective closed cohort study. *medRxiv*. 2020 Apr  
359 23;2020.04.18.20071134.
- 360
